# Supplementary material for: Discovery of Kasugamycin as a Potent Inhibitor of Glycoside Hydrolase Family 18 Chitinases
Source: PubMed Central journal article supplement (PMC8058351; doi:10.3389/fmolb.2021.640356), 2021-04-07
Supplement: datasheet1.pdf [file datasheet1.pdf]

*Supplementary Material*

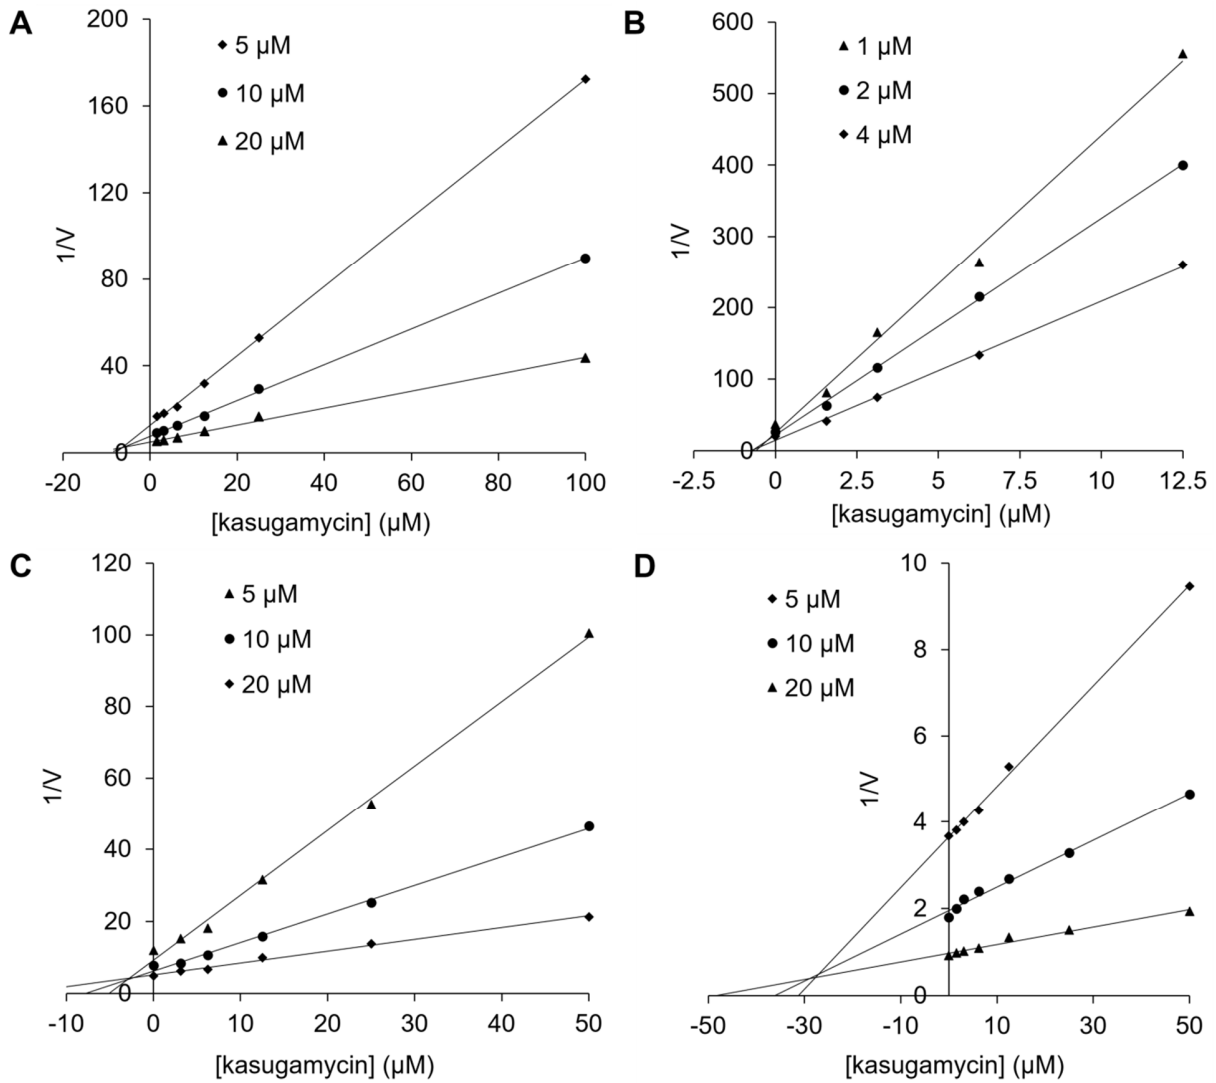

Figure S1. Inhibitory kinetics of kasugamycin against AMCCase (A), *OfChtI* (B), *OfChi-h* (C) and *SmChiA* (D).

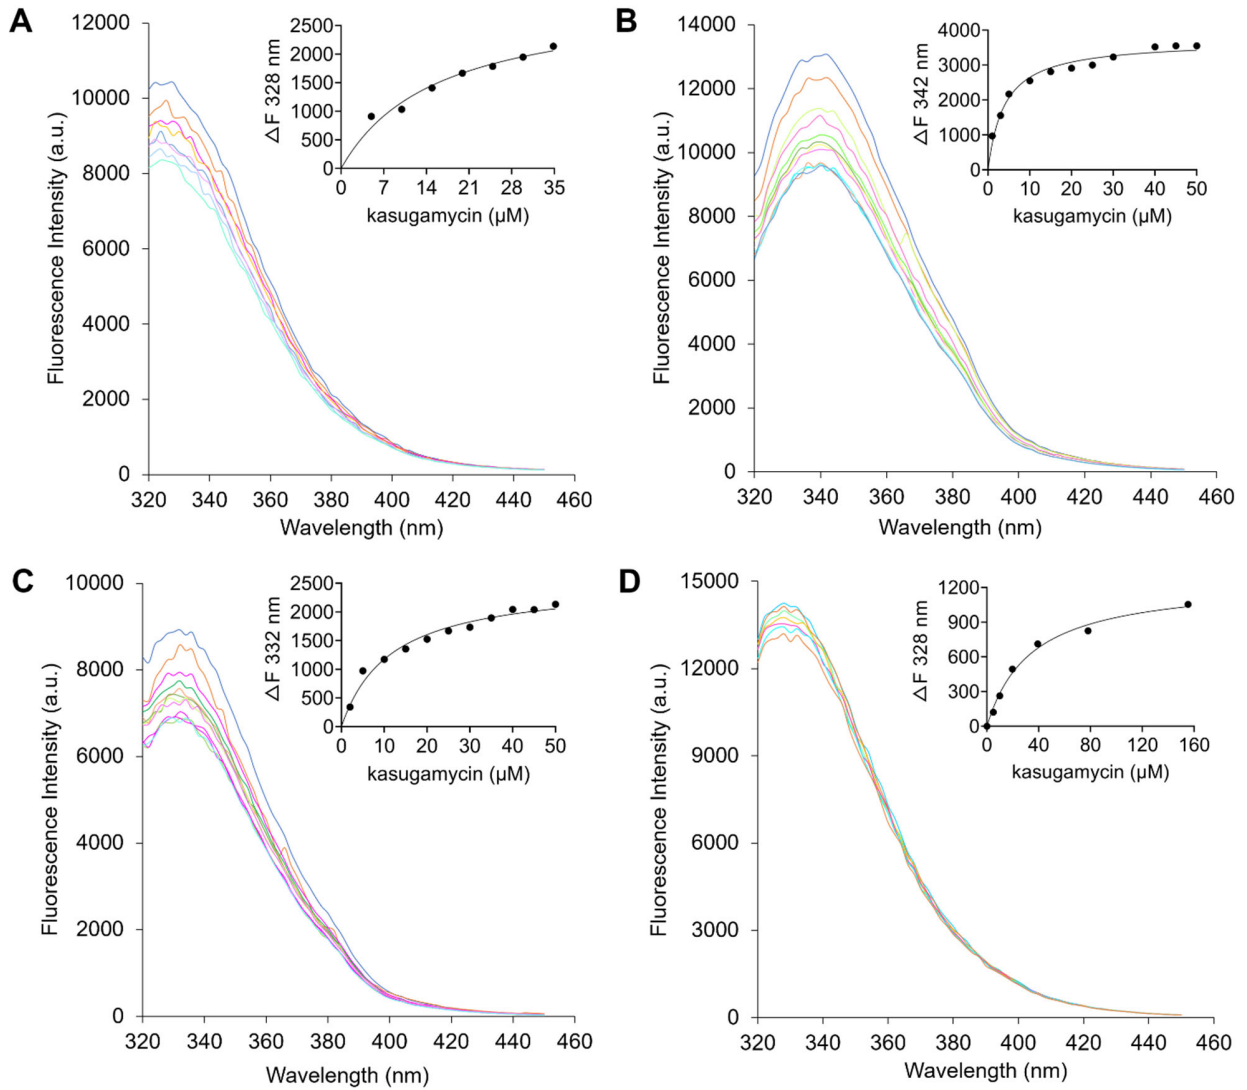

Figure S2. Binding affinities of kasugamycin to AMCase (A), *OfChI* (B), *OfChi-h* (C) and *SmChiA* (D).

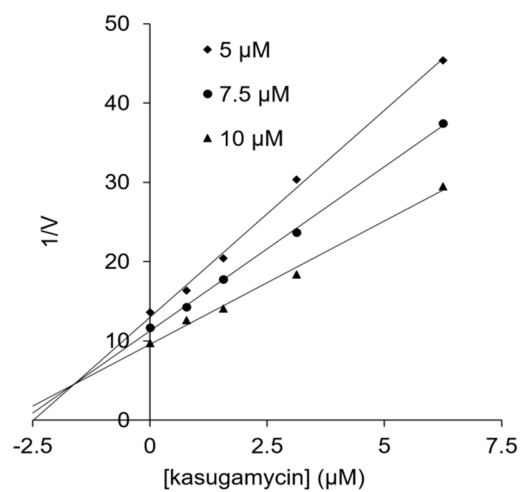

Figure S3. Inhibitory kinetic of kasugamycin against *HsCht* in buffer with 1.0 M NaCl.

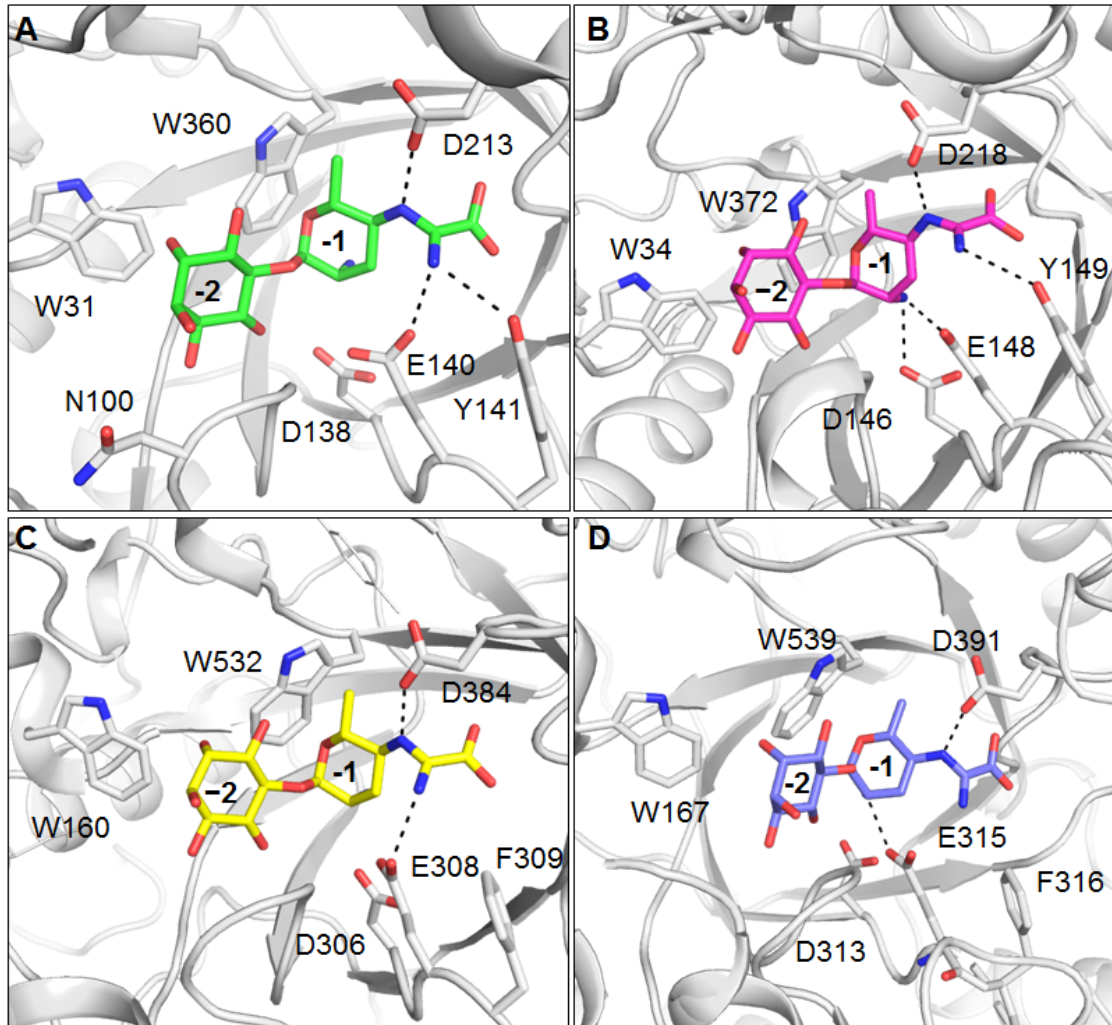

Figure S4. Modeled binding modes of kasugamycin to AMCase (A), *OfChtI* (B), *OfChi-h* (C) and *SmChiA* (D).
